# Supplementary material for: Case Report: Long-Term Survival of a Patient with Cerebral Metastasized Ovarian Carcinoma Treated with a Personalized Peptide Vaccine and Anti-PD-1 Therapy
Source: MDPI journal article supplement (doi:10.3390/vaccines12040397), 2024-04-09
Supplement: s1 [file s1]

## Supplementary Figures

### Supplementary Figure S1:

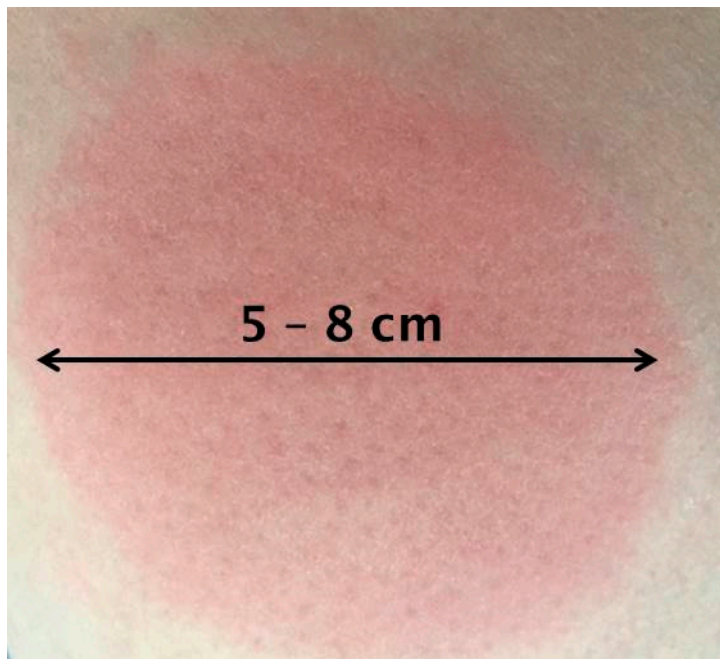

**Supplementary Figure S1:** Normal skin reaction several hours after injection of peptides and GM-CSF.

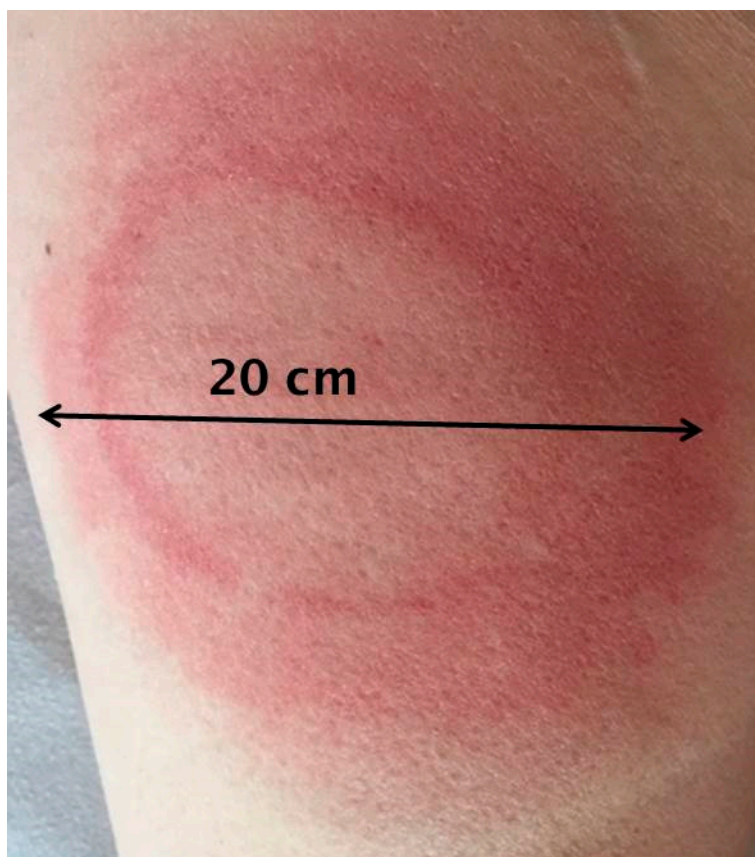

**Supplementary Figure S2:** Pronounced skin reaction of the patient after injection of peptides and GM-CSF 3 hours after vaccination no. 10 (6 months after first injection).
